# Supplementary material for: Reduced graphene oxide derived from the spent graphite anodes as a sulfur host in lithium–sulfur batteries
Source: Royal Society of Chemistry journal article supplement (doi:10.1039/d4ya00480a), 2024-11-12
Supplement: d4ya00480a1.pdf [file d4ya00480a1.pdf]

**Reduced graphene oxide derived from the spent graphite anodes as a sulfur host in lithium-sulfur batteries**

J. Priscilla Grace<sup>a</sup>, Y. Kaliprasad<sup>b</sup>, Surendra K. Martha<sup>a,\*</sup>

<sup>a</sup>Department of Chemistry, Indian Institute of Technology Hyderabad, Kandi, Sangareddy, Telangana 502284, India.

<sup>b</sup>Nile Limited, Lot No.24 A/A, MLA Colony. Road No.12, Banjara Hills, Hyderabad, India.

\*Corresponding author: Email: [martha@chy.iith.ac.in](mailto:martha@chy.iith.ac.in) (*Surendra K. Martha*),

Orcid id: <https://orcid.org/0000-0002-7762-7237>

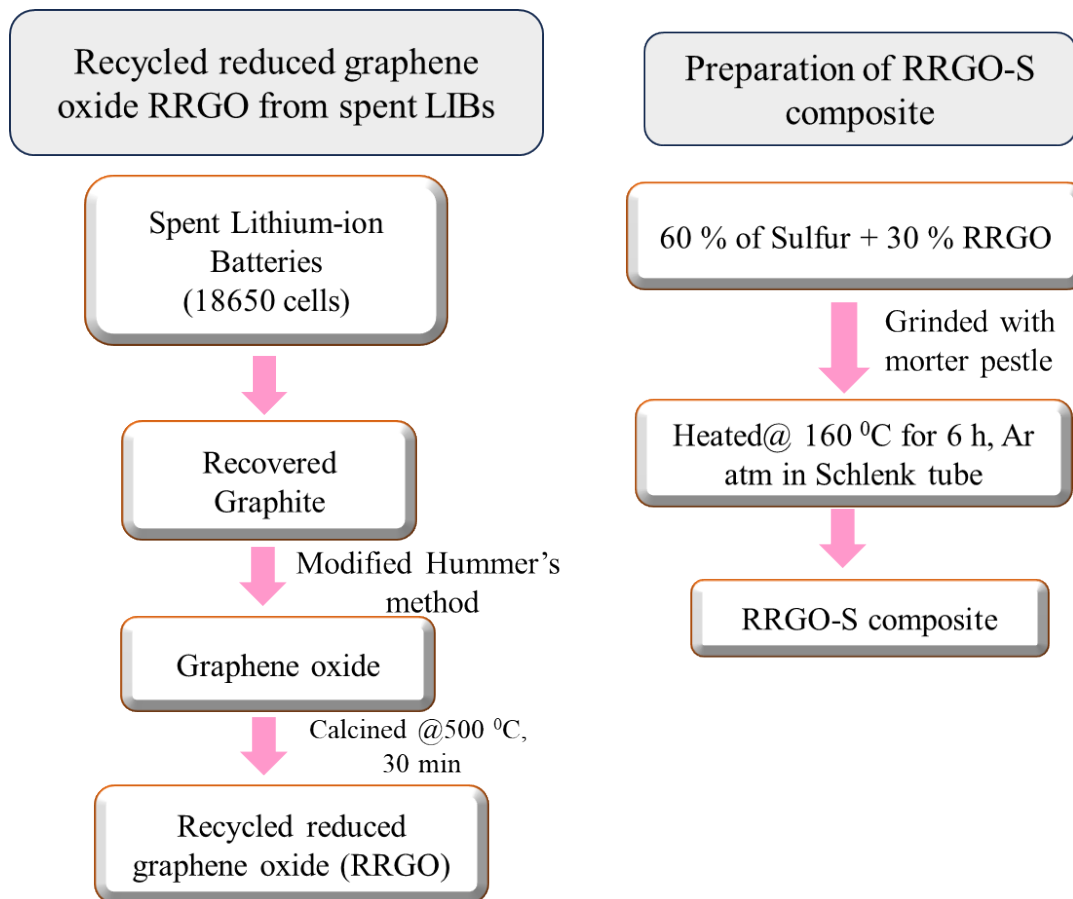

**Fig.S1.** Flow chart for the synthesis of RRGO and RRGO-S composite.

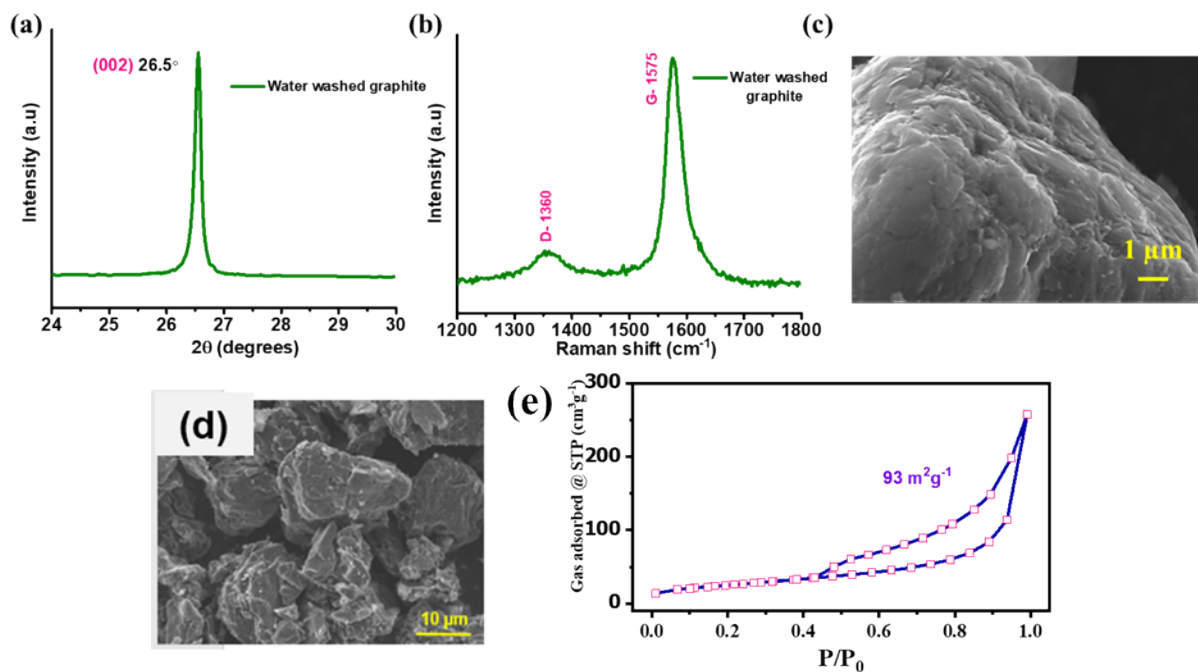

**Fig.S2.** (a) XRD, (b) Raman spectra, and (c-d) SEM of water-washed graphite, (e) BET adsorption-desorption curve of RRGO.

The textural properties of water-washed graphite were analyzed by SEM, XRD, and Raman spectra, as shown in Fig. S2. Fig.S2a, the XRD clearly shows a sharp (002) peak at 26.5° for a hexagonal crystal lattice of the graphite, and the Raman spectra demonstrates (Fig. S2b) a flat D band at 1360 and G band at 1575  $\text{cm}^{-1}$ ,  $I_D/I_G$  ratio of  $\sim 2$  thus depicting a more disordered graphitic phase. Fig. S2c,d displays SEM of water-washed graphite having a smooth surface. Fig. S2(e) represents the BET adsorption-desorption curve of RRGO with a BET surface area of 93  $\text{m}^2 \text{g}^{-1}$ .

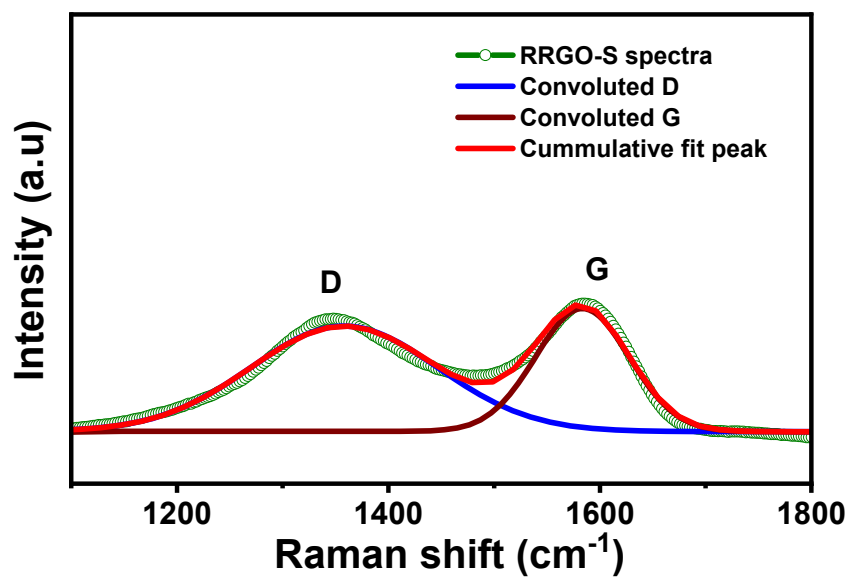

**Fig.S3.** Deconvoluted peaks of Raman spectra of RRGO-S composite.

The  $I_D/I_G$  ratio was calculated by FWHM which is  $\sim 2$ .

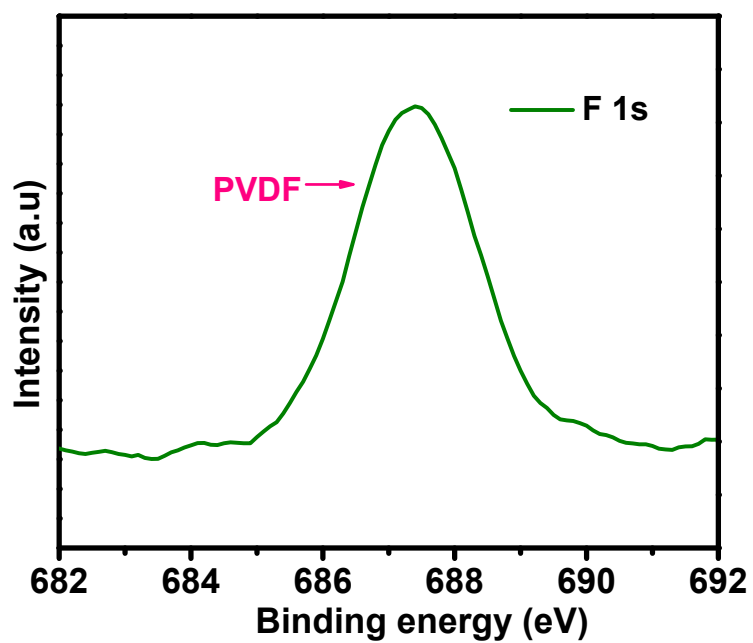

**Fig.S4.** High resolution F 1s spectra of RRGO-S@CF electrodes.

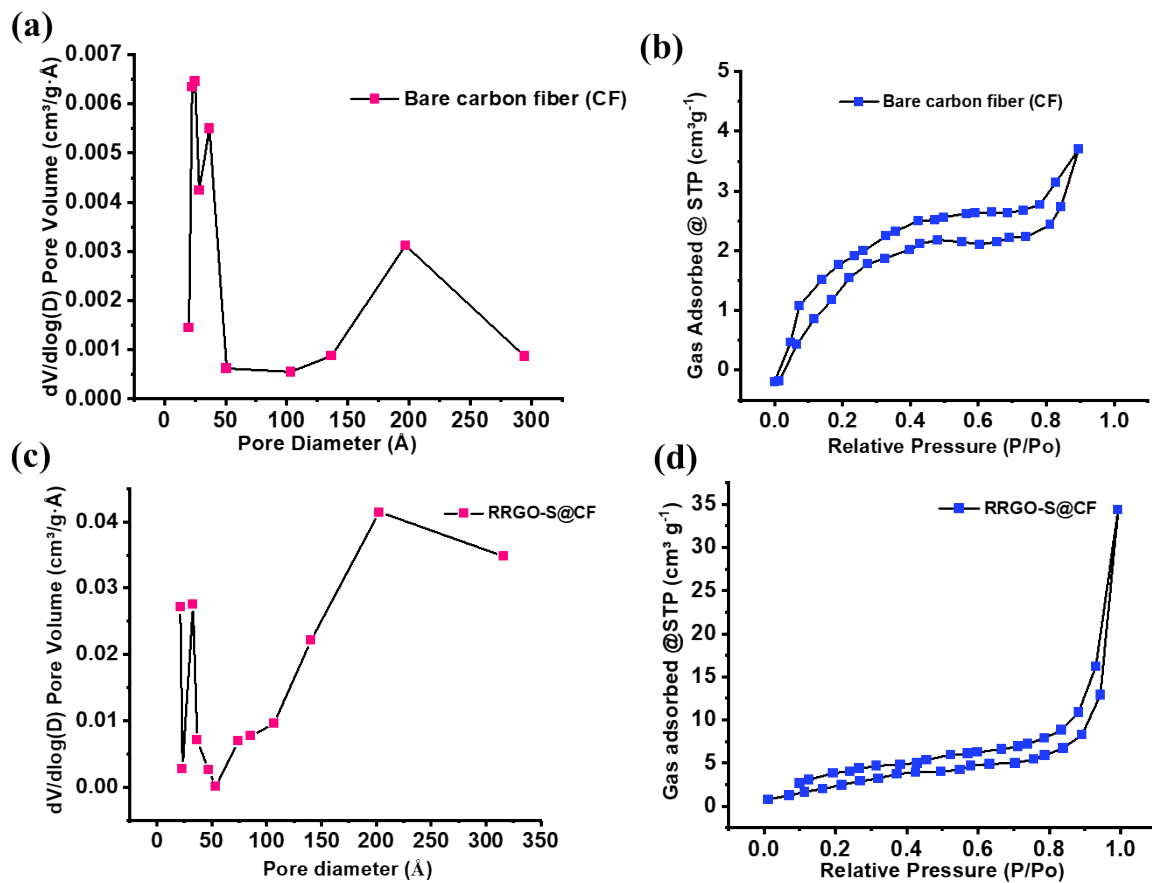

**Figure.S5.** BET surface area of (a,b) bare carbon fiber (CF) and (c,d) RRGO-S@CF electrode.

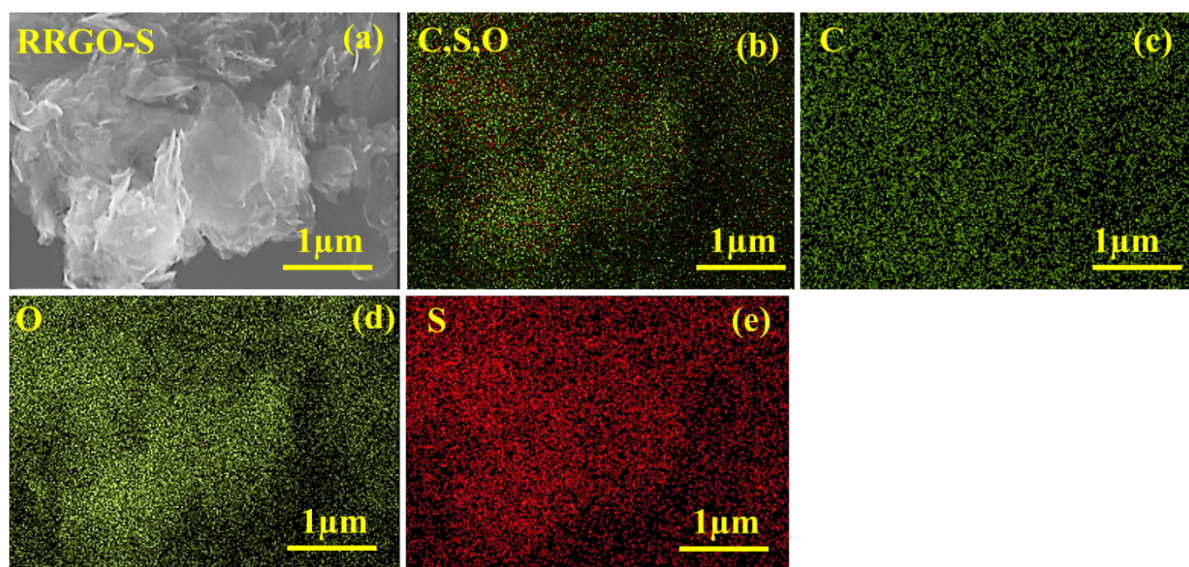

**Fig.S6.** EDAX images of the RRGO-S composite (a) SEM image (b) C, S, and O, (c) C, (d) O, and (e) S.

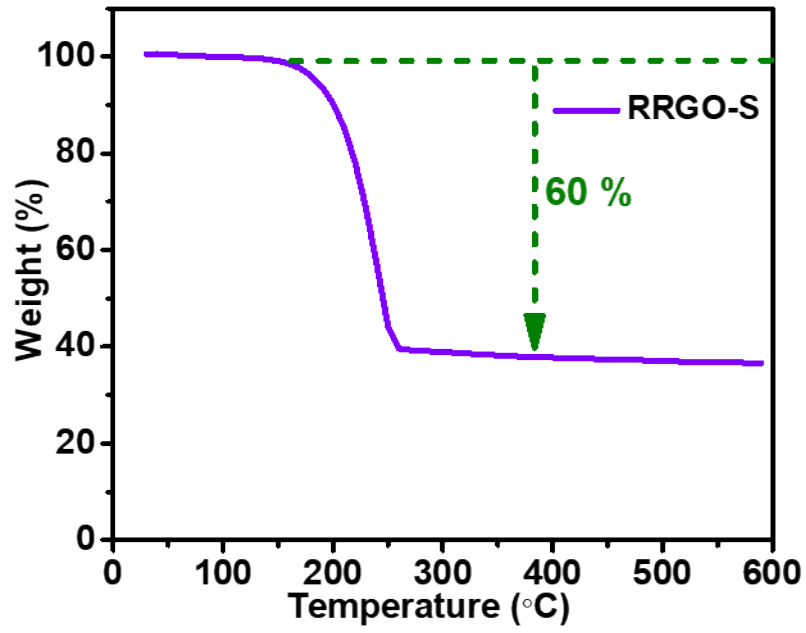

Fig.S7. TGA curves of RRGO-S composite.



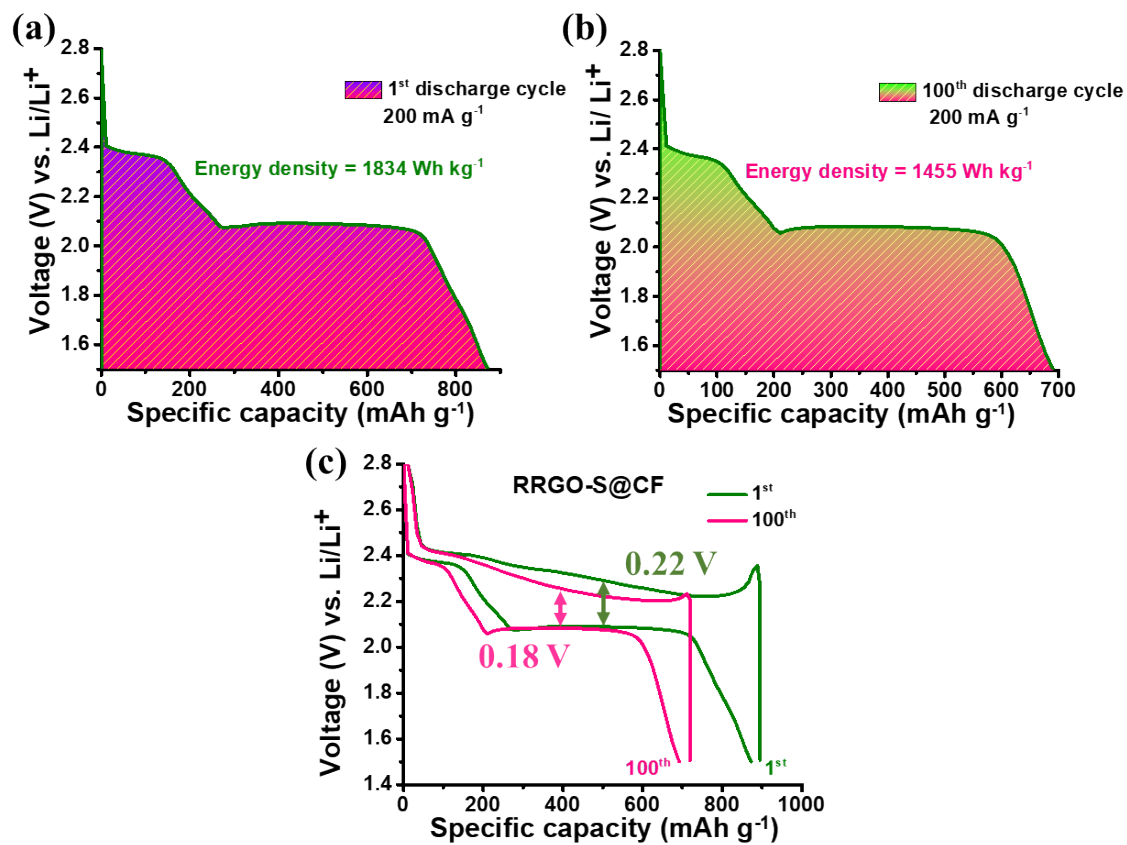

**Fig.S8.** Energy densities and the hysteresis plot of RRGO-S@CF during 1<sup>st</sup> and 100<sup>th</sup> cycles at 200 mA g<sup>-1</sup>.

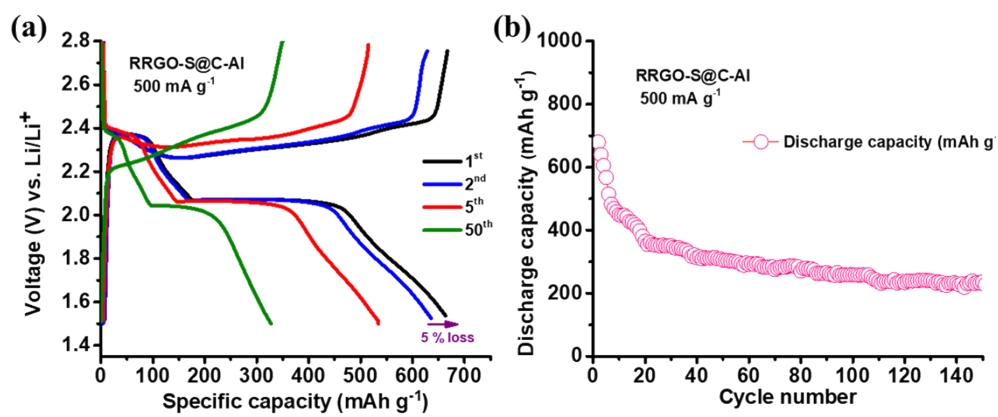

**Fig.S9.** (a,b) GCD and cycling stability plot of RRGO-S@C-Al at 500 mA g<sup>-1</sup>.

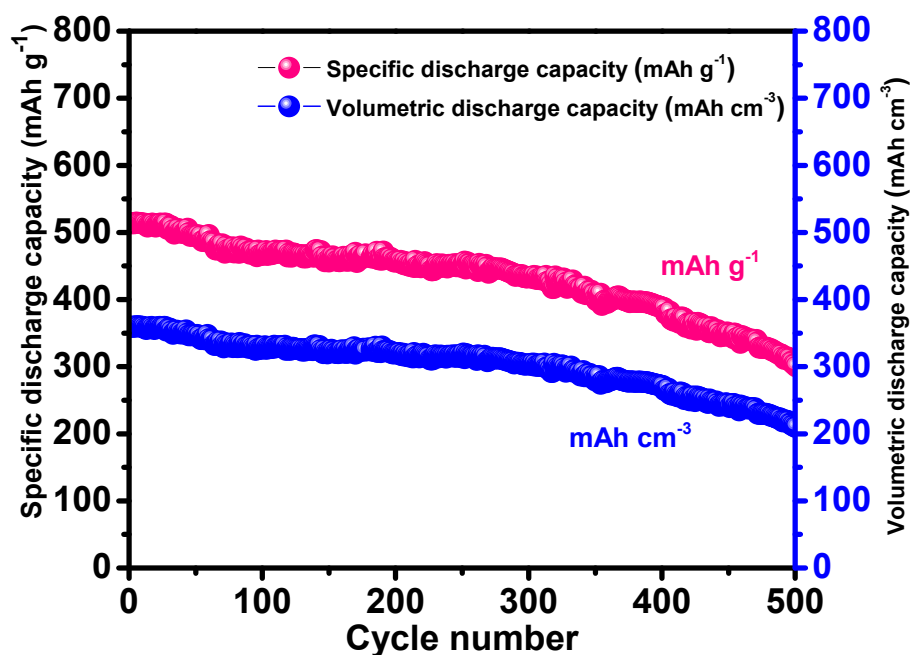

**Fig.S10.** Cyclic stability plot of specific and volumetric discharge capacities at 800 mA g<sup>-1</sup>.

The volumetric capacity has been calculated using the formula  $C_v = C_g \times m/t$ .  $C_v$  stands for volumetric capacity (mAh cm<sup>-3</sup>),  $C_g$  stands for gravimetric capacity (mAh g<sup>-1</sup>),  $m$  is the active mass loading in g cm<sup>-2</sup>, and  $t$  is the thickness of the electrode in cm. For the RRGO-S composite electrode, the active mass of the 1.13 cm<sup>2</sup> circular electrodes is 2 mg, and the coating thickness of electrodes is  $t = 35 \times 10^{-4}$  cm.

The volumetric capacities are ~30% lower than gravimetric capacities.

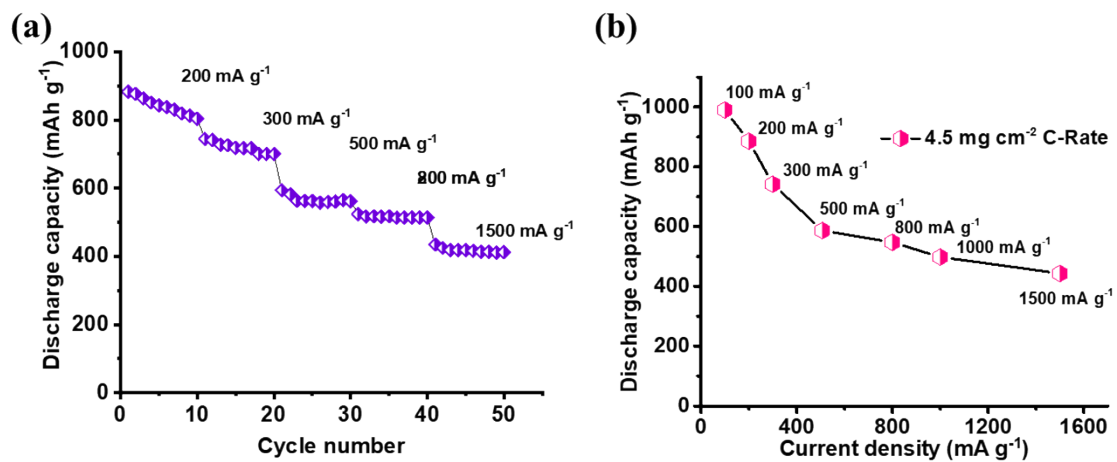

**Fig. S11.** Rate capability plot at different current densities (a) recorded 10 cycles for each current density (as depicted in Fig.5. (a,b) and (b) 4.5 mg cm<sup>-2</sup> active material loading of sulfur.

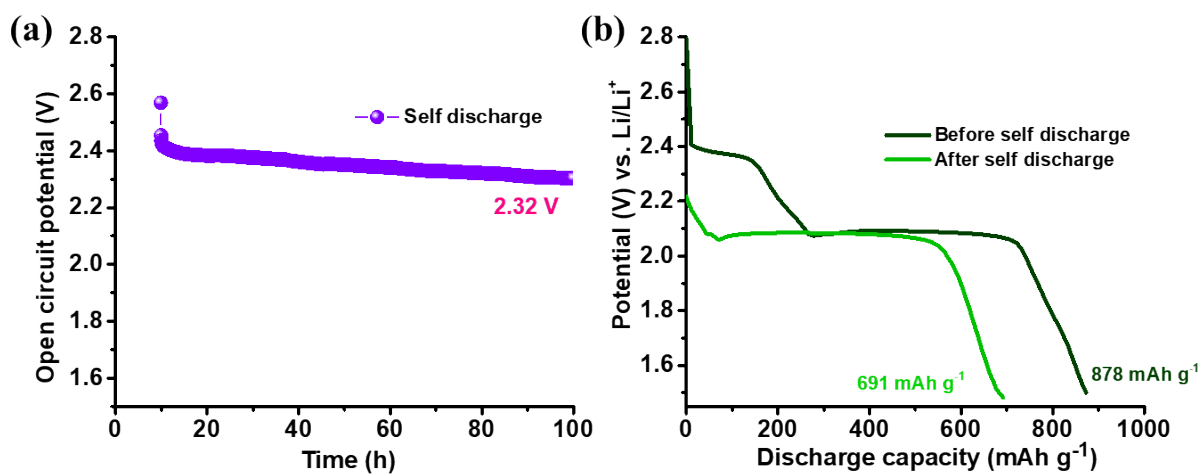

**Fig.S12.** (a) OCV during storage for 100 h after a full charge and (b) comparison of GCD before and after 100 h of storage (self-discharge). 20 % loss of capacity after storage has been observed.

**Table.ST1.** The literature survey of RGO-S composite electrode electrochemical performances in terms of capacities, capacity retention, and cycle number in comparison to the present work.

| Graphene-sulfur composite        | Weight % - Electrode area of S loading | Current density/ C-rate | Initial discharge capacity (mAh g <sup>-1</sup> )   | Capacity retention @ cycles                                     | References |
|----------------------------------|----------------------------------------|-------------------------|-----------------------------------------------------|-----------------------------------------------------------------|------------|
| GWS (Graphene wrapped sulfur)    | -                                      | 0.1 C                   | 808 mAh g <sup>-1</sup>                             | 93.7 % CE @100 <sup>th</sup> cycle                              | 1          |
| g-C/S                            | 80 %<br>1.2-1.5 mg cm <sup>-2</sup>    | 0.2 C                   | 1113                                                | 89 % @ 300 <sup>th</sup> cycle                                  | 2          |
| G/S-G (Graphene/sulfur@graphene) | 56%                                    | 0.1 C                   | 1036 mAh g <sup>-1</sup>                            | 60 % @ 200 <sup>th</sup> cycle                                  | 3          |
| S@GO                             | 92 %                                   | 0.2 C<br>1 C            | 1301 mAh g <sup>-1</sup><br>704 mAh g <sup>-1</sup> | 86 % @ 115 <sup>th</sup> cycle                                  | 4          |
| RGO@S                            | 55%                                    | 0.1 C<br>0.2 C          | 1381 mAh g <sup>-1</sup><br>792 mAh g <sup>-1</sup> | 70 % @150 <sup>th</sup> cycle<br>84 % @ 300 <sup>th</sup> cycle | 5          |
| 3D-NGS                           | 88 %<br>1mg cm <sup>-2</sup>           | 0.4 C                   | 792 mAh g <sup>-1</sup>                             | 93 % @ 145 <sup>th</sup> cycle                                  | 6          |
| NGS/S                            | 80 %                                   | 1 C                     | 1140 mAh g <sup>-1</sup>                            | 72 % @ 500 <sup>th</sup> cycle                                  | 7          |
| NanoS@G                          | -                                      | 0.2 C                   | 1400 mAh g <sup>-1</sup>                            | 51 % @ 100 <sup>th</sup> cycle                                  | 8          |

|                                                                                                                          |                                                                                    |                                                                                                                                                                                                                                                                          |                                                                                                                                               |                                                                                                                                 |          |
|--------------------------------------------------------------------------------------------------------------------------|------------------------------------------------------------------------------------|--------------------------------------------------------------------------------------------------------------------------------------------------------------------------------------------------------------------------------------------------------------------------|-----------------------------------------------------------------------------------------------------------------------------------------------|---------------------------------------------------------------------------------------------------------------------------------|----------|
| Leaf like<br>GO/S                                                                                                        | 70 %<br>2.7 mg cm <sup>-2</sup><br><br>4 mg cm <sup>-2</sup>                       | 0.5 C                                                                                                                                                                                                                                                                    | 600 mAh g <sup>-1</sup><br><br>600 mAh g <sup>-1</sup>                                                                                        | 70 % @ 600 <sup>th</sup><br>cycle<br><br>60 % @ 600 <sup>th</sup><br>cycle                                                      | 9        |
| SG/S<br>Spent<br>graphite/sul<br>fur<br>composite                                                                        | 78 %<br>~ 1 mg cm <sup>-2</sup>                                                    | 0.2 C<br>0.5 C                                                                                                                                                                                                                                                           | 1377 mAh g <sup>-1</sup><br>765 mAh g <sup>-1</sup>                                                                                           | 70 % @ 500 <sup>th</sup><br>cycle                                                                                               | 10       |
| S-KB /<br>Spent<br>graphite<br>interlayer                                                                                | 60 %<br>0.7-1.2 mg<br>cm <sup>-2</sup>                                             | 1 C                                                                                                                                                                                                                                                                      | 968                                                                                                                                           | ~ 65 % 500 <sup>th</sup><br>cycle                                                                                               | 11       |
| <b><u>Our work</u></b><br><b>RRGO-<br/>S@CF<br/>(Recycled<br/>RGO-S<br/>composite<br/>onto 3D-<br/>carbon<br/>fiber)</b> | <b>60 %</b><br><b>~ 2mg cm<sup>-2</sup></b><br><br><b>~ 4.5 mg cm<sup>-2</sup></b> | <b>(0.03 C of<br/>theoretical<br/>capacity)<br/>50 mA g<sup>-1</sup></b><br><br><b>(C/3 of<br/>theoretical<br/>capacity)<br/>500 mA g<sup>-1</sup></b><br><br><b>(C/2 of<br/>theoretical<br/>capacity)<br/>800 mA g<sup>-1</sup></b><br><br><b>500 mA g<sup>-1</sup></b> | <b>1113 mAh g<sup>-1</sup></b><br><br><b>552 mAh g<sup>-1</sup></b><br><br><b>535 mAh g<sup>-1</sup></b><br><br><b>575 mAh g<sup>-1</sup></b> | <b>81 % @ 150<sup>th</sup><br/>cycle</b><br><b>73 % @ 400<sup>th</sup><br/>cycle</b><br><b>81% @ 150<sup>th</sup><br/>cycle</b> | <b>-</b> |

## References

1. X. Gao, J. Li, D. Guan, and C. Yuan, *ACS Appl. Mater. Interfaces*, **6**, 4154–4159 (2014).
2. M. Yu et al., *Journal of materials chemistry a*, **3**, 9609–9615 (2015).
3. Z. Tao, J. Xiao, Z. Yang, and H. Wang, *Journal of Nanomaterials*, **2019** (2019).
4. J. M. Chabu et al., *Applied Surface Science*, **493**, 533–540 (2019).
5. Y. Liu, M. Yao, L. Zhang, and Z. Niu, *Journal of Energy Chemistry*, **38**, 199–206 (2019).
6. C. Wang et al., *Journal of Materials Chemistry A*, **2**, 5018–5023 (2014).
7. X. Wang, Z. Zhang, Y. Qu, Y. Lai, and J. Li, *Journal of Power Sources*, **256**, 361–368 (2014).
8. J. Zhang et al., *Journal of Power Sources*, **270**, 1–8 (2014).
9. S. Yuan et al., *Advanced Science*, **2**, 1500071 (2015).
10. X. Yang et al., *Carbon*, **199**, 215–223 (2022).
11. Q. Xu et al., *Green Chemistry*, **23**, 942–950 (2021).
